# Supplementary material for: Association between Lower Normal Free Thyroxine Concentrations and Obesity Phenotype in Healthy Euthyroid Subjects
Source: Hindawi journal article supplement (doi:10.1155/2014/104318), 2014-01-01
Supplement: f1 [file 104318.f1.pdf]

Supplementary table 1. . Multiple regression analysis of determinants of HOMA-IR

|                    | HOMA-IR <sup>*</sup> |          |           |          |           |          |
|--------------------|----------------------|----------|-----------|----------|-----------|----------|
|                    | Model 1              |          | Model 2   |          | Model 3   |          |
|                    | $\beta^a$            | <i>P</i> | $\beta^a$ | <i>P</i> | $\beta^a$ | <i>P</i> |
| Age                | -0.090               | < 0.001  | -0.083    | < 0.001  | -0.090    | < 0.001  |
| Sex                | 0.054                | < 0.001  | 0.083     | < 0.001  | 0.054     | < 0.001  |
| BMI                | 0.289                | < 0.001  | 0.302     | < 0.001  | 0.289     | < 0.001  |
| WC                 | 0.174                | < 0.001  | 0.177     | < 0.001  | 0.174     | < 0.001  |
| Hypertension       | 0.066                | < 0.001  | 0.064     | < 0.001  | 0.066     | < 0.001  |
| Heart rate         | 0.144                | < 0.001  | 0.136     | < 0.001  | 0.144     | < 0.001  |
| Hyperlipidemia     | 0.142                | < 0.001  | 0.138     | < 0.001  | 0.141     | < 0.001  |
| FT4 <sup>*</sup>   | -0.126               | < 0.001  | –         | –        | -0.126    | < 0.001  |
| TSH <sup>*</sup>   | –                    | –        | 0.003     | 0.835    | 0.004     | 0.693    |
| R <sup>2</sup> (%) | 30.6                 |          | 29.1      |          | 30.6      |          |

<sup>\*</sup>Tested by log-transformed; <sup>a</sup>Standardized coefficient. These results are adjusted for all of the other variables listed in the table.
